# Supplementary material for: Controlled deposition of Au on (BiO)2CO3microspheres: the size and content of Au nanoparticles matter
Source: Royal Society of Chemistry journal article supplement (doi:10.1039/c5dt00844a), 2015-01-01
Supplement: c5dt00844a1.pdf [file c5dt00844a1.pdf]

**Electronic Supplementary Information for**  
**Controlled Deposition of Au on (BiO)<sub>2</sub>CO<sub>3</sub> Microspheres:**  
**Size and Content of Au Nanoparticles Matter**

Qiuyan Li,<sup>‡a</sup> Xiaodong Hao,<sup>‡b</sup> Xiaolong Guo,<sup>b</sup> Fan Dong<sup>\*a</sup> and Yuxin Zhang<sup>\*b,c</sup>

<sup>a</sup> Chongqing Key Laboratory of Catalysis and Functional Organic Molecules, College of Environmental and Biological Engineering, Chongqing Technology and Business University, Chongqing 400067, P. R. China

<sup>b</sup> College of Materials Science and Engineering, Chongqing University, Chongqing 400044, P. R. China

<sup>c</sup> National Key Laboratory of Fundamental Science of Micro/Nano-Devices and System Technology, Chongqing University, Chongqing 400044, P. R. China

To whom correspondence should be addressed.

E-mail address: dfctbu@126.com (F. Dong), zhangyuxin@cqu.edu.cn (Y. X. Zhang)

<sup>‡</sup> Qiuyan Li and Xiaodong Hao contributed equally to this work.

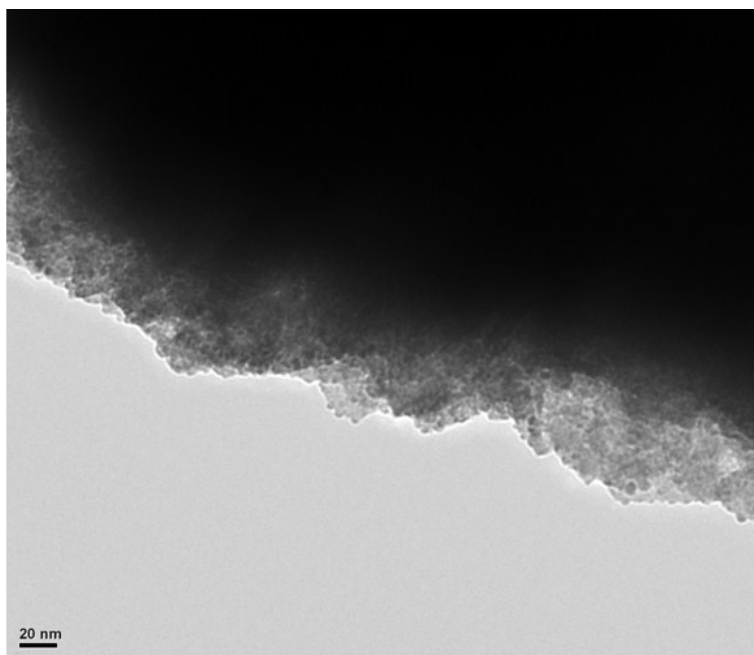

Fig. S1 Enlarged TEM view of Au/BOC-1 (4ml)

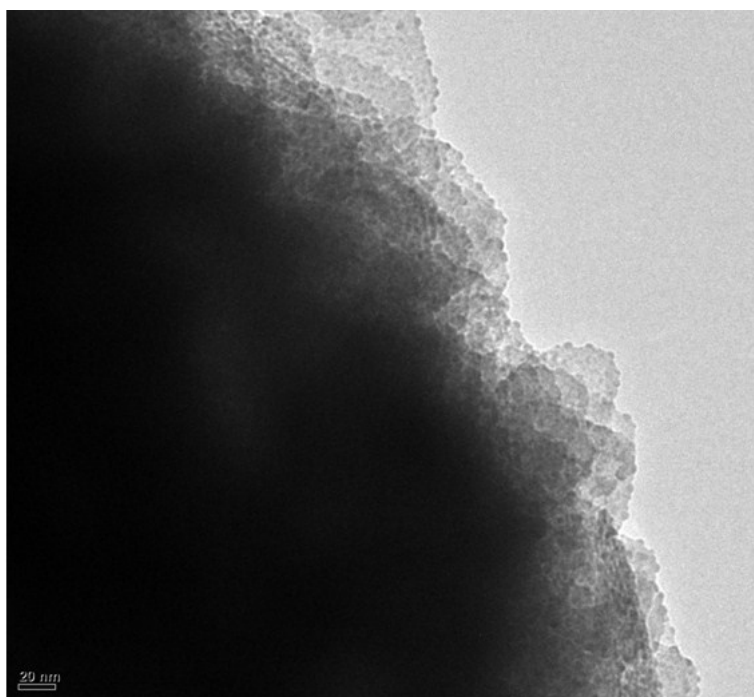

Fig. S2 Enlarged TEM view of Au/BOC-2

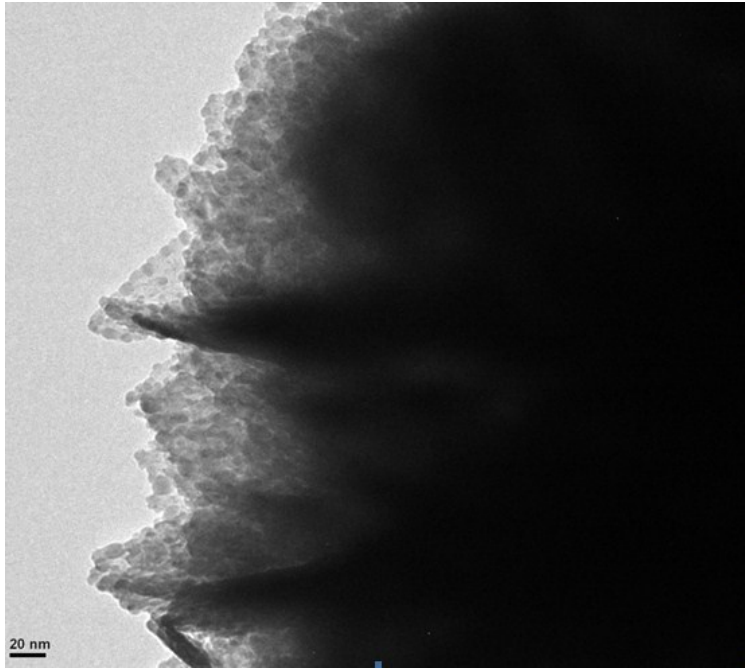

Fig. S3 Enlarged TEM view of Au/BOC-3

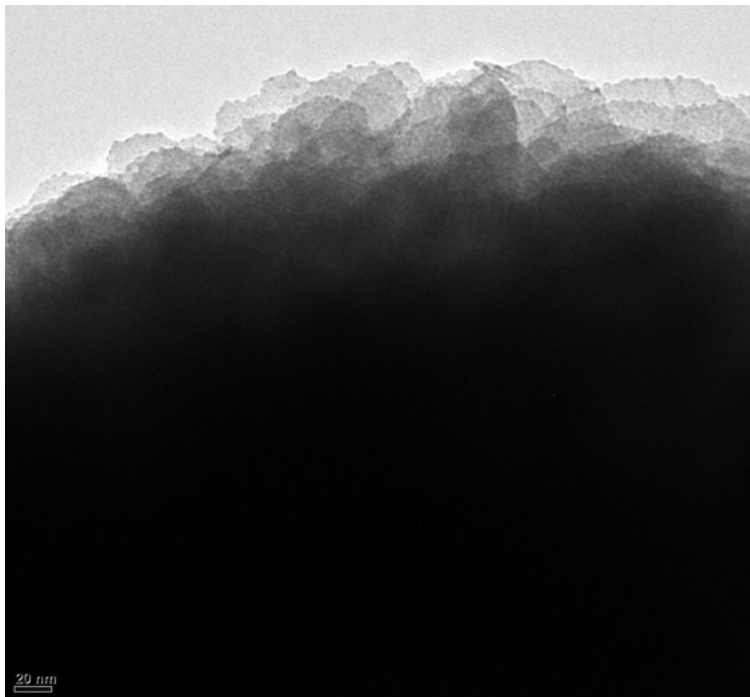

Fig. S4 Enlarged TEM view Au/BOC composites with 2 ml Au NPs content

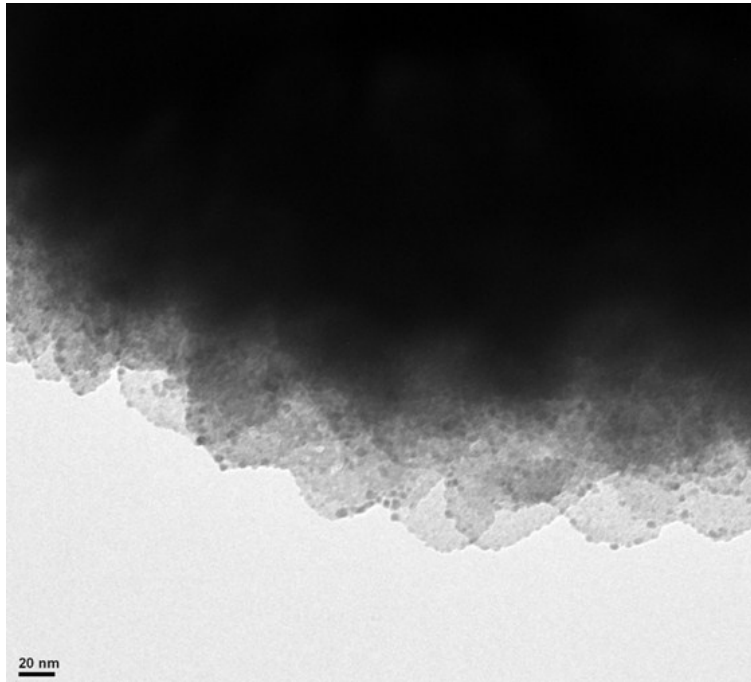

Fig. S5 Enlarged TEM view Au/BOC composites with 8 ml Au NPs content

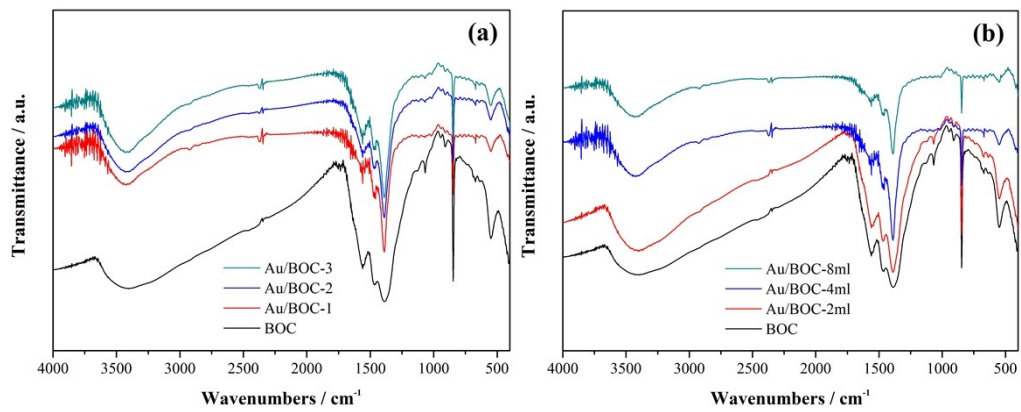

Fig. S6 FT-IR spectra of as-prepared BOC and Au/BOC composites.

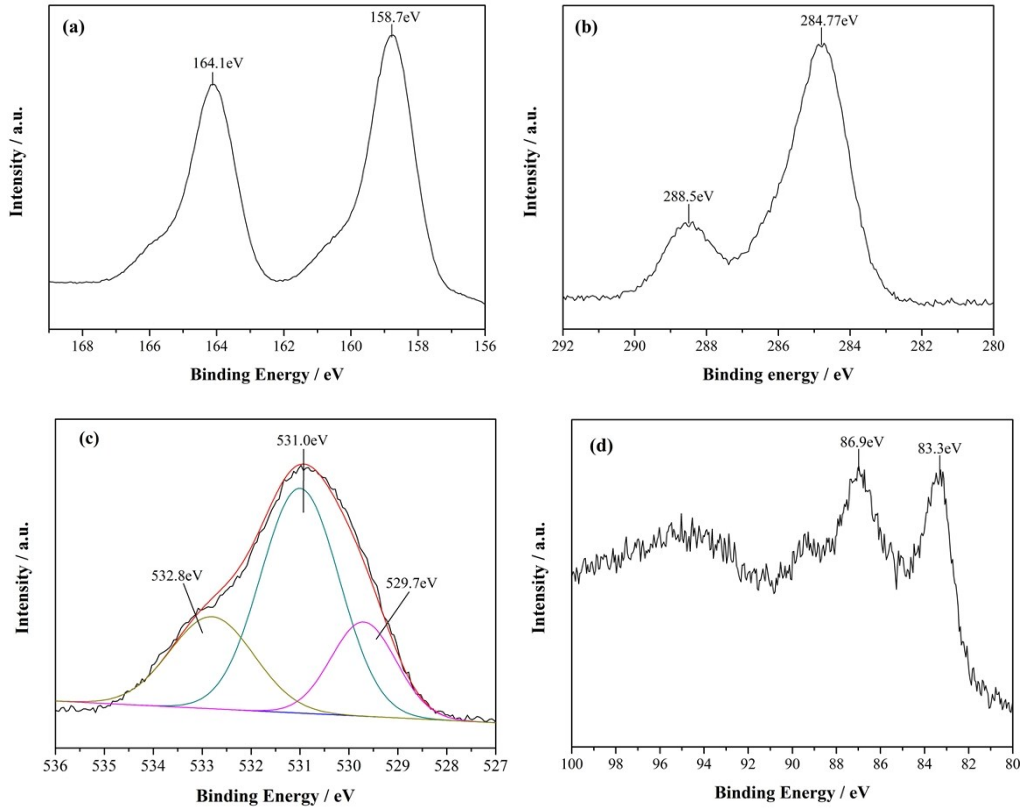

Fig. S7 XPS spectra of Au/BOC-8ml, Bi4f (a), C1s (b), O1s (c) and Au4f (d).

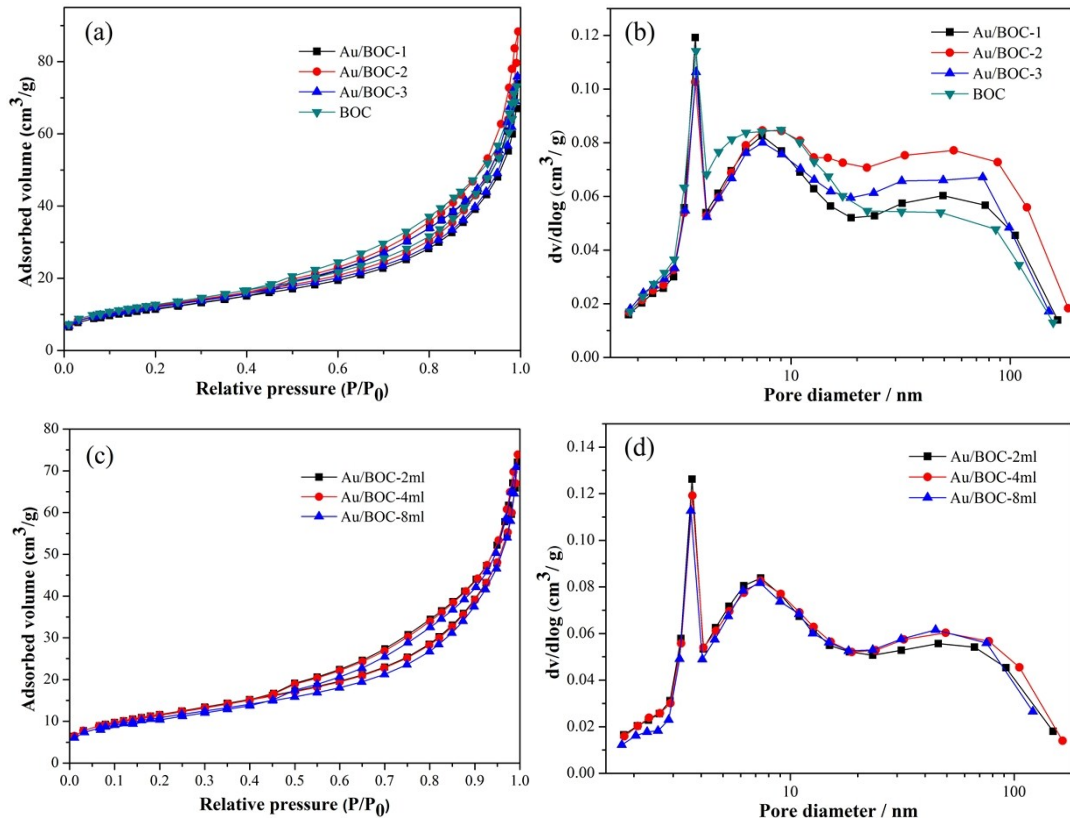

Fig. S8  $N_2$  adsorption-desorption isotherms (a, c) and pore size distribution curves (b, d) of BOC and Au/BOC composites.

Table S1 BET surface area ( $S_{\text{BET}}$ ) and pore volume ( $V$ ) for six samples studied in this work.

| Sample                  | DDT (ml) | Au (ml) | $S_{\text{BET}}$ (m <sup>2</sup> /g) | $V$ (cm <sup>3</sup> /g) |
|-------------------------|----------|---------|--------------------------------------|--------------------------|
| BOC                     | -        | -       | 46                                   | 0.1134                   |
| Au/BOC-1 ( Au/BOC-4 mL) | 0.82     | 4       | 42                                   | 0.1143                   |
| Au/BOC-2                | 0.42     | 4       | 45                                   | 0.1367                   |
| Au/BOC-3                | 0.082    | 4       | 43                                   | 0.1174                   |
| Au/BOC-2 mL             | 0.82     | 2       | 42                                   | 0.1115                   |
| Au/BOC-8 mL             | 0.82     | 8       | 40                                   | 0.1096                   |

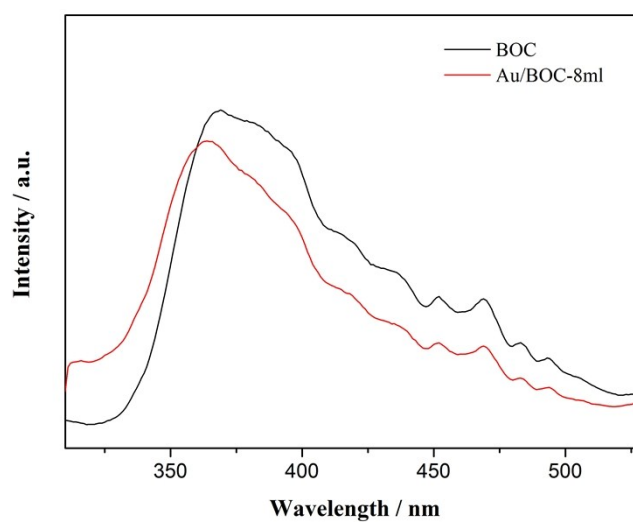

Fig. S9 PL spectrum of BOC and Au/BOC composites.
